# Supplementary material for: Impact of Patient Blood Management on Red Blood Cell Utilization in an Urban Community Teaching Hospital: A Seven-Year Retrospective Study
Source: MDPI journal article supplement (doi:10.3390/life14020232), 2024-02-07
Supplement: s1 [file s1]

# Impact of Patient Blood Management on Red Blood Cell Utilization in an Urban Community Teaching Hospital: A Seven-Year Retrospective Study

Ding Wen Wu <sup>1,2</sup>, Mark T. Friedman <sup>3,\*</sup>, Daniel P. Lombardi <sup>4</sup>, Richard Hwang <sup>1</sup>, Joel Sender <sup>4</sup>, Valdet Cobaj <sup>1</sup>, Masooma Niazi <sup>1</sup>, Yanhua Li <sup>5</sup> and Robert Karpinos <sup>6</sup>

<sup>1</sup> Department of Pathology, SBH Health System, Bronx, NY, 10457, USA; dingwen.wu@nyulangone.org (D.W.W.); vcobaj@sbhny.org (V.C.); mniazi@sbhny.org (M.N.)

<sup>2</sup> Department of Pathology, New York University Grossman School of Medicine, New York, NY, 10016, USA

<sup>3</sup> Department of Pathology, New York University Grossman Long Island School of Medicine, Mineola, NY, 11501, USA

<sup>4</sup> Department of Medicine, SBH Health System, Bronx, NY, USA; dlombardi@sbhny.org (D.P.L.); senderj@outlook.com (J.S.);

<sup>5</sup> Division of Transfusion Medicine, Department of Medicine, UMass Chan Medical School, Worcester, MA, USA; yanhua.li@umassmemorial.org

<sup>6</sup> Department of Anesthesiology, SBH Health System, Bronx, NY, USA; rkarpinos@sbhny.org

\* Correspondence: mark.friedman@nyulangone.org; Tel.: +1-516-663-8307; Fax: +1-516-663-4581

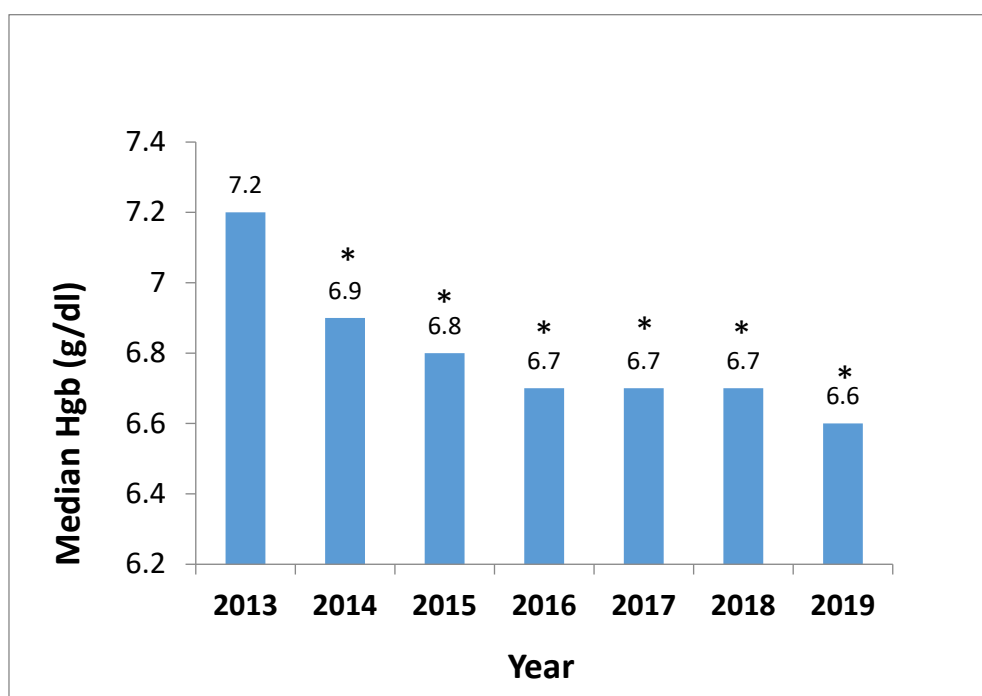

**Figure S1.** Median hemoglobin level for RBC transfusion orders \* P value < 0.0001 comparing to the number in year 2013.
